# Supplementary material for: Development of an intervention to optimise preschoolers’ 24-hour movement behaviours: a co-creation process with parents
Source: Research Square preprint supplement (doi:10.21203/rs.3.rs-6723502/v1), 2025-12-10
Supplement: Supplementary file 1 [file 12fa68a16e0f4e93ab478778.docx]

**SUPPLEMENTARY FILE**

***Table S1: Matrix of PO’s and CO’s for preschoolers focused on the needs of SDT***

| PO | Autonomy (perceived control) | Competence (self-efficacy and skills) | Relatedness (perceived social support and perceived social bonding) |
| --- | --- | --- | --- |
| **Preschoolers perform more PA/day, at least 3 hours/day of which 1 hour MVPA** | CO1: Express preference when (being involved in) choosing a PA | CO2: Express confidence in performing PA even when execution of certain activities sometimes fails, when there is no one to play with, when the weather is bad | CO3: Express feeling social approval and support by others (parents) when performing PA  CO4: Express affection to others (parents) when performing PA |
| **Preschoolers limit screen time to less than 1 hour/day** | CO5: Express preference when they choose/are involved in planning screen free moments  CO6: Express preference when choosing alternatives for screen time | CO7: Express confidence in performing screen free time/days, even when the weather is bad, when tired | CO8: Express feeling social approval and support by others (parents) when limiting ST |
| **Preschoolers perform a sleep routine before a fixed bedtime every day** | CO9: Express preference when being involved in creating a sleep routine  CO10: Express preference when choosing within the sleep routine | CO11: Express confidence in performing the sleep routine, even when another activity seems more fun  CO12: Demonstrates to be able to go to bed at a fixed time, even when parents or siblings stay awake or when doing a fun activity | CO13: Express feeling social approval and support by others (parents) when performing the sleep routine  CO14: Express affection to others (parents) when performing the sleep routine  CO15: Express feeling social approval and support by others (parents) when going to bed at a fixed time |

PA=physical activity, MVPA=moderate-to-vigorous physical activity, PO=performance objective, CO=change objective

***Table S2: Matrix for PO’s and CO’s for parents focussing on preschoolers’ PA***

| PO | Knowledge | Attitude | Skills | Self-Efficacy | Perceived social support |
| --- | --- | --- | --- | --- | --- |
| **Parents decide to encourage more PA in their preschooler** | COPA1: Know what a healthy amount of PA is for a preschooler | COPA2: Recognize the importance of deciding to encourage PA for health in their preschooler | COPA3: Demonstrate ability to decide to encourage their preschooler to engage in more PA | COPA4: Express confidence to decide to encourage their preschooler to be more physically active, even when time is limited, energy levels are low, the weather is bad, or others are not doing so | COPA5: Express feeling supported in deciding to encourage PA in their preschooler by other parents |
| **Parents let their preschooler choose PA (autonomy support)** | COPA6: Know why it is important to let a preschooler choose PA | COPA7: Recognize the importance of a preschooler’s choice in PA | COPA8: Demonstrate the ability to let their preschooler choose PA and support them in making those choices | COPA9: Express confidence to let their preschooler choose PA’s, even when time is limited, energy levels are low, or others are not doing so |  |
| **Parents compliment their preschooler’s PA (competence support)** | COPA10: Know why it is important to compliment a preschooler’s PA | COPA11: Recognize the importance of complimenting a preschooler’s PA | COPA12: Demonstrate the ability to give their preschooler a compliment about the preschooler’s PA | COPA13: Express confidence to give a compliment to their preschooler’s PA, even when time is limited, energy levels are low, or others are not doing so |  |
| **Parents involve the preschooler in planning their preschooler’s PA (structure/competence support, autonomy support)** | COPA14: Know why it is important to involve a preschooler in planning the preschooler’s PA | COPA15: Recognize the importance of planning a preschooler’s PA  COPA16: Recognize the importance of involving the child in creating the plan | COPA17: Demonstrate the ability to involve their preschooler in planning the preschooler’s PA | COPA18: Express confidence to involve their preschooler in planning their preschooler’s PA, even when time is limited, energy levels are low, or others are not doing so |  |
| **Parents involve positively in their preschooler’s PA (relatedness/positive involvement),**   - **by showing interest in their preschooler’s PA** - **by engaging in PA together with their preschooler** | COPA19: Know why it is important to involve positively in their preschooler’s PA and how to do so? | COPA20: Recognise the importance of involving positively in a preschooler’s PA by showing interest in the preschoolers PA and engaging in PA together with the preschooler | COPA21: Demonstrate the ability to show interest in their preschooler's PA  COPA22: Demonstrate the ability to engage in PA together with their preschooler | COPA23: Express confidence to involve positively in their preschooler’s PA by showing interest in the preschoolers PA and engaging in PA together with the preschooler, even when time is limited, energy levels are low, or others are not doing so |  |

PA=physical activity, PO=performance objective, CO=change objective

***Table S3: Matrix for PO’s and CO’s for parents focussing on preschoolers’ ST***

| **PO** | Knowledge | Attitude | Skills | Self-Efficacy | Perceived social support |
| --- | --- | --- | --- | --- | --- |
| **Parents decide to encourage less ST in their preschooler** | COST1: Know what the WHO guideline for ST in preschoolers is. | COST2: Recognize the importance of deciding to limit ST in preschoolers | COST3: Demonstrate the ability to decide to encourage less ST in their preschooler | COST4: Express confidence to decide to encourage their preschooler in less ST, even when time is limited, energy levels are low, the weather is bad, or others are not doing so | COST5: Express feeling supported in deciding to encourage less ST in their preschooler by other parents |
| **Parents offer their preschoolers alternatives to screen time to choose from (autonomy support)** | COST6: Know why it is important to offer a preschooler alternatives to screen time to choose from  COST7: List a variety of alternatives for their preschooler’s ST | COST8: Recognize the importance to offer a preschooler alternatives to screen time to choose from | COST9: Demonstrate the ability to offer their preschooler alternatives for ST to choose from | COST10: Express confidence to offer alternatives for their preschooler’s ST to choose from, even when time is limited, energy levels are low, the weather is bad, or others are not doing so |  |
| **Parents work together with their preschoolers to set rules for the preschooler’s ST (structure/competence support)** | COST11: Know why it is important to work together with a preschooler to set rules for the preschooler’s ST | COST12: Recognize the importance of setting ST rules for their preschooler  COST13: Recognize the importance of involving the child in setting rules | COST14: Demonstrate the ability that they can work together with their preschooler to set rules for the preschooler’s ST | COST15: Express to work together with their preschooler to set rules for the preschooler’s ST, even when time is limited, energy levels are low, or others are not doing so |  |
| **Parents explain why ST rules are important to their preschooler (relatedness/positive involvement)** | COST16: Know why it is important to explain the importance of ST rules to a preschooler | COST17: Recognize the importance of explaining why rules are important to their preschoolers | COST18: Demonstrate the ability that they can explain to their preschooler why ST rules are important | COST19: Express confidence to explain to their preschoolers why ST rules are important, even when time is limited, energy levels are low, or others are not doing so |  |
| **Parents consistently implement their preschooler’s ST rules (structure/competence support)** | COST20: Know why it is important to consistently implement a preschooler’s ST rules | COST21: Recognize the importance of consistently implementing a preschooler’s ST rules | COST22: Demonstrate the ability to consistently implement their preschooler’s ST rules | COST23: Express confidence to consistently implement their preschooler’s ST rules, even when time is limited, energy levels are low, or others are not doing so |  |

ST=screen time, PO=performance objective, CO=change objective

***Table S4: Matrix for PO’s and CO’s for parents focussing on preschoolers’ sleep***

| **PO** | Knowledge | Attitude | Skills | Self-Efficacy | Perceived social support |
| --- | --- | --- | --- | --- | --- |
| **Parents decide to encourage a sufficient amount of sleep in their preschooler (10 to 13 hours)** | COSL1: Know what the WHO guideline for sleep in preschoolers is. | COSL2: Recognize the importance of deciding to encourage a sufficient amount of sleep in preschoolers | COSL3: Demonstrate the ability to decide to encourage a sufficient amount of sleep in their preschooler | COSL4: Express confidence to decide to encourage a sufficient amount of sleep in their preschooler, even when time is limited, energy levels are low, or others are not doing so | COSL5: Express feeling supported by other parents in deciding to encourage a sufficient amount of sleep in their preschooler |
| **Parents involve their preschooler in developing a sleep routine (structure/competence support, autonomy support)** | COSL6: Know why it is important to involve a preschooler in developing a sleep routine | COSL7: Recognize the importance of sleep routine  COSL8: Recognize the importance of involving the preschooler in creating the sleep routine | COSL9: Demonstrate the ability to create a sleep routine together with their preschooler | COSL10: Express confidence to create a sleep routine together with their preschooler, even when time is limited, energy levels are low, or others are not doing so |  |
| **Parents let their preschooler choose within their sleep routine, e.g. “which bedtime story do you want?” (autonomy support)** | COSL11: Know why it is important to let a preschooler choose within a sleep routine | COSL12: Recognize the importance of choice for preschoolers in a sleep routine | COSL13: Demonstrate the ability to let their preschooler choose within their sleep routine | COSL14: Express confidence to let their preschooler choose within their sleep routine, even when time is limited, energy levels are low, or others are not doing so |  |
| **Parents participate in (parts of) the preschooler’s sleep routine (relatedness/positive involvement)** | COSL15: Know why it is important to participate in the sleep routine of a preschooler | COSL16: Recognize the importance of being involved in their preschooler’s sleep routine | COSL17: Demonstrate the ability that they can be involved in their preschooler’s sleep routine | COSL18: Express confidence to be involved in their preschooler’s sleep routine, even when time is limited, energy levels are low, or others are not doing so |  |
| **Parents consistently implement a sleep routine for their preschooler with a fixed bedtime (structure/competence)** | COSL19: Know why it is important to  consistently implement a sleep routine for a preschooler with a fixed bedtime | COSL20: Recognize the importance of consistently implementing a sleep routine for a preschooler with a fixed bedtime | COSL21: Demonstrate the ability to consistently implement a sleep routine for their preschooler with a fixed bedtime | COSL22: Express confidence to consistently implement a sleep routine for their preschooler with a fixed bedtime even when time is limited, energy levels are low, or others are not doing so |  |

PO=performance objective, CO=change objective

***Table S5: Applications and behaviour change methods linked to CO’s of parents***

| Application | Method for behaviour change | CO’s* |
| --- | --- | --- |
| Presentation showing what a healthy amount of time spent on each of the behaviours is and the benefits on health | Verbal persuasion | COPA1, COPA2, COST1, SOST2, SOSL1, SOSL2 |
| A poll followed by a discussion on guideline compliance: - how many preschoolers comply with the guidelines in general, - what makes it difficult to comply, - what makes it feasible to comply | Consciousness raising | COPA1, COPA2, COST1, SOST2, SOSL1, SOSL2 |
| Provide opportunities for social comparison | COPA5, COST5, SOSL5 |
| Mobilizing social support | COPA5, COST5, SOSL5 |
| A video with an expert explaining SDT and how to link SDT with parenting | Modelling | COPA6, COPA7, COPA10, COPA11, COPA14, COPA15, COPA16, COPA19, COPA20, COST6, COST8, COST11, COST12, COST13, COST16, COST17, COST20, COST21, COSL6, COSL7, COSL8, COSL11, COSL12, COSL15, COSL16, COSL19, COSL20 |
| Verbal persuasion |
| Providing inspiration for alternative activities to replace ST | Facilitation | COST7, SOST9, SOST10 |
| An interactive story to parents and preschoolers about a puppet who made a week schedule or sleep routine with her parents. They go through a part of the week schedule or sleep routine and explain how the rules of the week schedule or sleep routine game goes. In the story the researcher explains why performing healthy behaviours is important. The researcher shows how one can deal with potential difficult situations. | Modelling | COPA1-COPA4, COPA6-COPA23, COST1-COST4, COST6-COST23, COSL1-COSL4, COSL6-COSL22 |
| PA games within the story | Direct experience | COPA3, COPA4, COPA19-COPA23 |
| Parents and children make a week schedule or sleep routine together | Goal setting | COPA3, COPA4, COPA8, COPA9, COPA12, COPA13, COPA17, COPA18, COPA2, COPA22, COPA23, COST3, COST4, COST9, COST10, COST14, COST15, COST18, COST19, COST22, COST23, COSL3, COSL4, COSL9, COSL10, COSL13, COSL14, COSL13, COSL14, COSL17, COSL18, COSL21, COSL22 |
| Parent and preschooler present their week schedule or sleep routine to another parent and child. | Public commitment | COPA4, COPA9, COPA13, COPA18, COPA23, COST4, COST10, COST15, COST19, COST23, COSL4, COSL10, COSL14, COSL18, COSL22 |
| Provide opportunities for social comparison | COPA5, COST5, COSL5 |
| Modelling | COPA1-COPA4, COPA6-COPA23, COST1-COST4, COST6-COST23, COSL1-COSL4, COSL6-COSL22 |
| Questioning: What are the WHO guidelines? | Repeated exposure | COPA1, COPA2, COST1, COST2, COSL1, COSL2 |
| Ordering what was learnt throughout the sessions according to parenting practice based on SDT | Guided practices | COPA6-COPA23, COST6-COST23, COSL6-COSL22 |
| Repeated exposure | COPA6, COPA7, COPA10, COPA11, COPA14, COPA15, COPA19, COPA20, COST6, COST8, COST11, COST12, COST13, COST16, COST17, COST20, COST21, COSL6, COSL7, COSL8, COSL11, COSL12, COSL15, COSL16, COSL19, COSL20 |
| Discussing how the week schedule or sleep routine was perceived since the last session and problem solving for difficult situations | Guided practices | COPA3, COPA4, COPA8, COPA9, COPA12, COPA13, COPA17, COPA18, COPA21, COPA22, COPA23, COST3, COST4, COST9, COST10, COST14, COST15, COST18, COST19, COST22, COST23, COSL3, COSL4, COSL9, COSL10, COSL13, COSL14, COSL17, COSL18, COSL21, COSL22 |
| Feedback |
| Provide opportunities for social comparison | COPA5, COST5, COSL5 |
| Mobilizing social support | COPA5, COST5, COSL5 |
| Planning coping responses/problem-solving | COPA3, COPA4, COPA8, COPA9, COPA12, COPA13, COPA17, COPA18, COPA21, COPA22, COPA23, COST3, COST4, COST9, COST10, COST14, COST15, COST18, COST19, COST22, COST23, COSL3, COSL4, COSL9, COSL10, COSL13, COSL14, COSL17, COSL18, COSL21, COSL22 |
| Modelling |
| PA games for parent and preschooler together. The games can be played at home with basic attributes that can be found in all home environments. | Modelling | COPA10-COPA13, COPA3, COPA4, COPA19-COPA23 |
| Direct experience | COPA3, COPA4, COPA19-COPA23 |
| Facilitation | COPA3, COPA4, COPA12, COPA13, COPA21-COPA23 |
| Overview of what the parents have learnt throughout the session with practical examples | Repeated exposure | COPA1, COPA2, COPA6, COPA7, COPA10, COPA11, COPA14, COPA15, COPA16, COPA19, COPA20, COST1, COST2, COST6, COST7, COST8, COST11, COST12, COST13, COST16, COST17, COST20, COST21, COSL1, COSL2, COSL6, COSL7, COSL8, COSL11, COSL12, COSL15, COSL16, COSL19, COSL20 |
| Explanation of stadia of behavioural change and sharing tips on how to prevent a relapse and how to deal with a relapse. Practice: “if…then… plans”, “advantages and disadvantages schemes”. | Guided practices | COPA3, COPA4, COPA8, COPA9, COPA12, COPA13, COPA17, COPA18, COPA21, COPA22, COPA23, COST3, COST4, COST9, COST10, COST14, COST15, COST18, COST19, COST22, COST23, COSL3, COSL4, COSL9, COSL10, COSL13, COSL14, COSL17, COSL18, COSL21, COSL22 |
| Modelling |
| Goal setting |
| Self-monitoring of behaviour |
| Planning coping responses |
| Set graded tasks |

PA=physical activity, ST=screen time, CO=change objective

*The CO’s are described in supplementary tables S2-S4.

***Table S6: Content and outcomes of the feasibility group***

| **Test moments (number of parents that attended)** | **Content** | **Outcome** |
| --- | --- | --- |
| Feedback on evaluation procedures (n=7) | Parent-child dyads tested the evaluation measures and provided written and oral feedback.   - Parent: Demographic questionnaire - Parent: Parenting practices questionnaire - Parent: Diary of one week for screen time and accelerometer wear time of child - Child: anthropometrics: height, weight, waist and hip circumference - Parent and child: 24h/7days accelerometer | - Questionnaire was considered long and some formulations needed revision. - It was helpful to introduce the accelerometer as a superhero belt. - Overall parents addressed wearing the accelerometer was feasible, however for some the quality of the belt was not optimal. Therefore it was decided to invest in new belts. |
| Information session  (n=6) | - Getting to know each other and behavioural agreements - Introduction to 24-hour movement behaviour and its importance for health - Example of a day of preschooler Kamiel - Interactive quiz (pollev.com) - Schematic presentation of SDT - Inspiration for alternatives for screen time, including the material box - During this session, preschoolers perform sport with university students | - There was time left. Based on the comments that the intervention of 10 sessions was considered intensive, it was decided to delete some sessions and reorganize the content of the deleted sessions in other sessions. As such the SDT will be more thoroughly presented in the first session and practical exercises in SDT will be added to the support group sessions. Based on this adaptation the intervention was reduced from 10 to 7 sessions. - Parents addressed the need for an expert that presents an information session. Therefore a video of a professor that explains SDT in the context of parenting was added to the information session. - Parents addressed the interactive part of this session was a strength   Process evaluation scores:*   - 1Clear goal – mean (SD): 4.67 (0.52) - 2Innovative – mean (SD): 3.10 (0.66) - 3General satisfaction - mean (SD): 4.50 (0.55) - 4Apply content at home - mean (SD): 3.83 (0.41) |
| Planning session (n=6) | - Interactive story of puppet who made and follows a week schedule - Workshop of parent and child making their week schedule together - Presenting the week schedule to another parent-child dyad | - Interactive story telling with movement games in between is successful to keep the attention of the preschoolers. - There was some chaos to explain the week schedule to the parents. Therefore it was decided to let the preschooler play a game with assistants, while the facilitator gave the explanation to the parents - The week schedule had to many activity options (cards): therefore it was decided to simplify the options, especially for the youngest preschoolers. - Parents were satisfied with the “practical” week schedule template - Preschoolers were enthusiastic about the material box (they could take a toy home since the previous session)   Process evaluation scores:   - 1Clear goal – mean (SD): 4.75 (0.46) - 2Innovative – mean (SD): 3.00 (0.93) - 3General satisfaction - mean (SD): 4.38 (0.74) - 4Apply content at home - mean (SD): 3.5 (1.20) |
| Movement game session  (n=5) | Movement games together: obstacle course, parachute, lower body work-out, aerobics, rhythmic movement with drums. All with material everyone has at home. | - Parents found the games inspirational. - Parents addresses they were not able to fully try out the week schedule, at least two weeks between sessions is necessary. - Overall comment of some parents: make sure to explain why a certain tool could work (theoretical background)   Process evaluation scores:   - 1Clear goal – mean (SD): 4.67 (0.82) - 2Innovative – mean (SD): 2.75 (0.88) - 3General satisfaction - mean (SD): 4.50 (0.55) - 4Apply content at home - mean (SD): 3.83 (0.41) |

*At the end of each session parents were asked to complete a small questionnaire in which they needed to score each question from 1 to 5 with "1=not at all" and "5=to a great extent". The questions were:

1 To what extent was the goal of the session clear?

2 To what extent was the content of the session new to you?

3 To what extent are you satisfied with the session?

4 To what extent do you think you can apply the content of the session at home?

If not mentioned in the outcome, the intervention content was considered feasible
